# Supplementary material for: Malignant pleural mesothelioma: treatment patterns and humanistic burden of disease in Europe
Source: PubMed Central journal article supplement (PMC9229520; doi:10.1186/s12885-022-09750-7), 2022-06-23

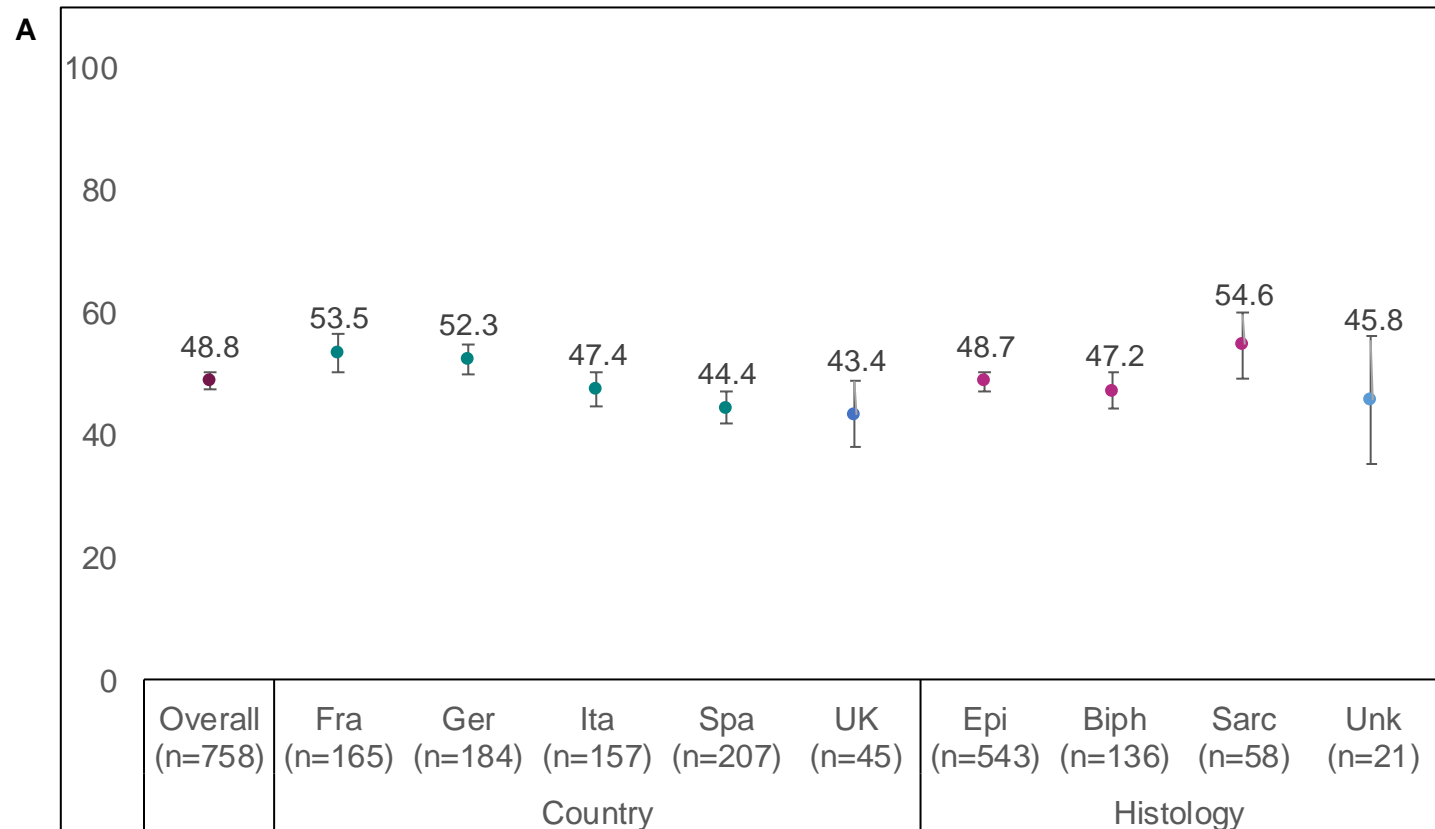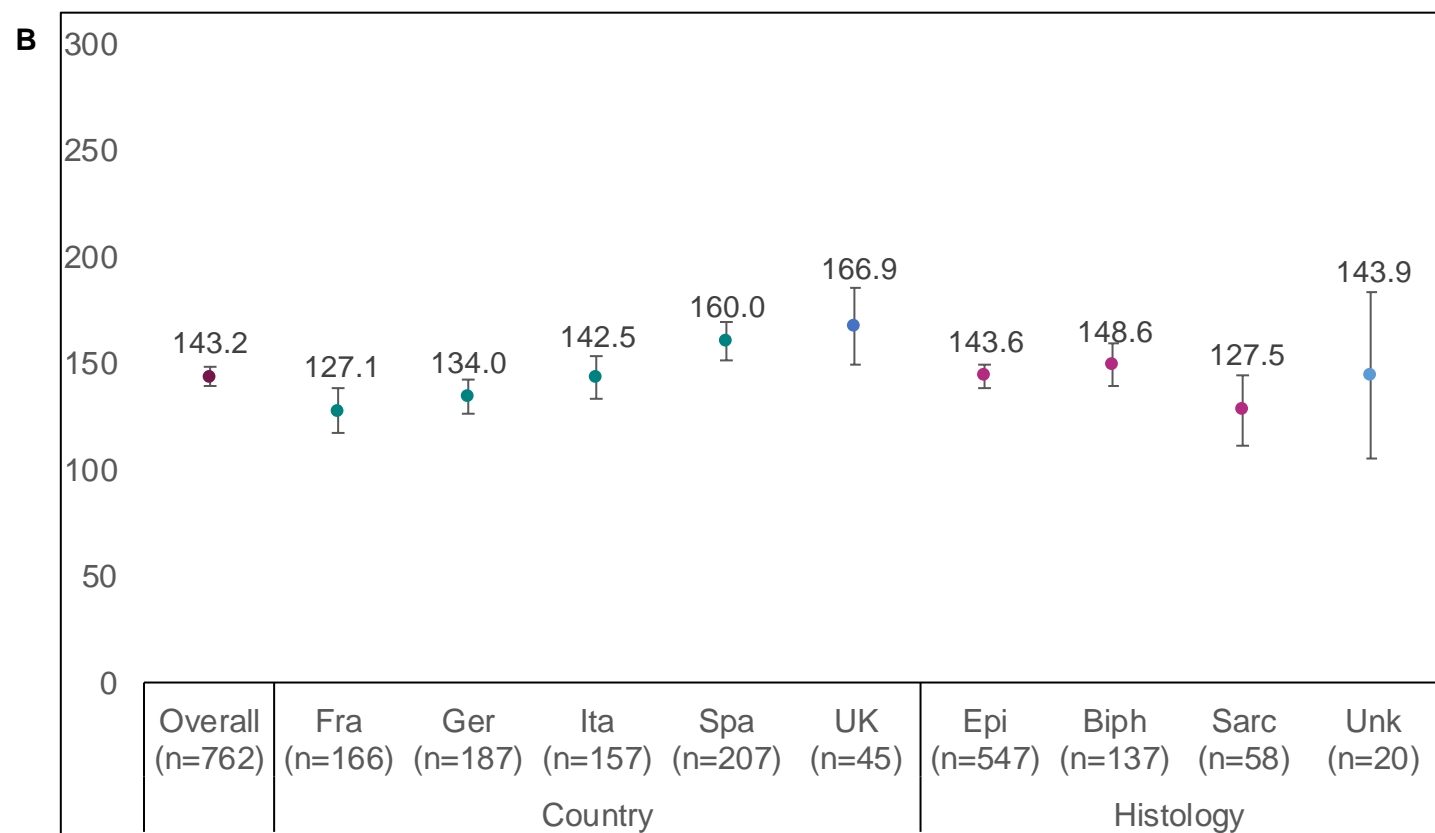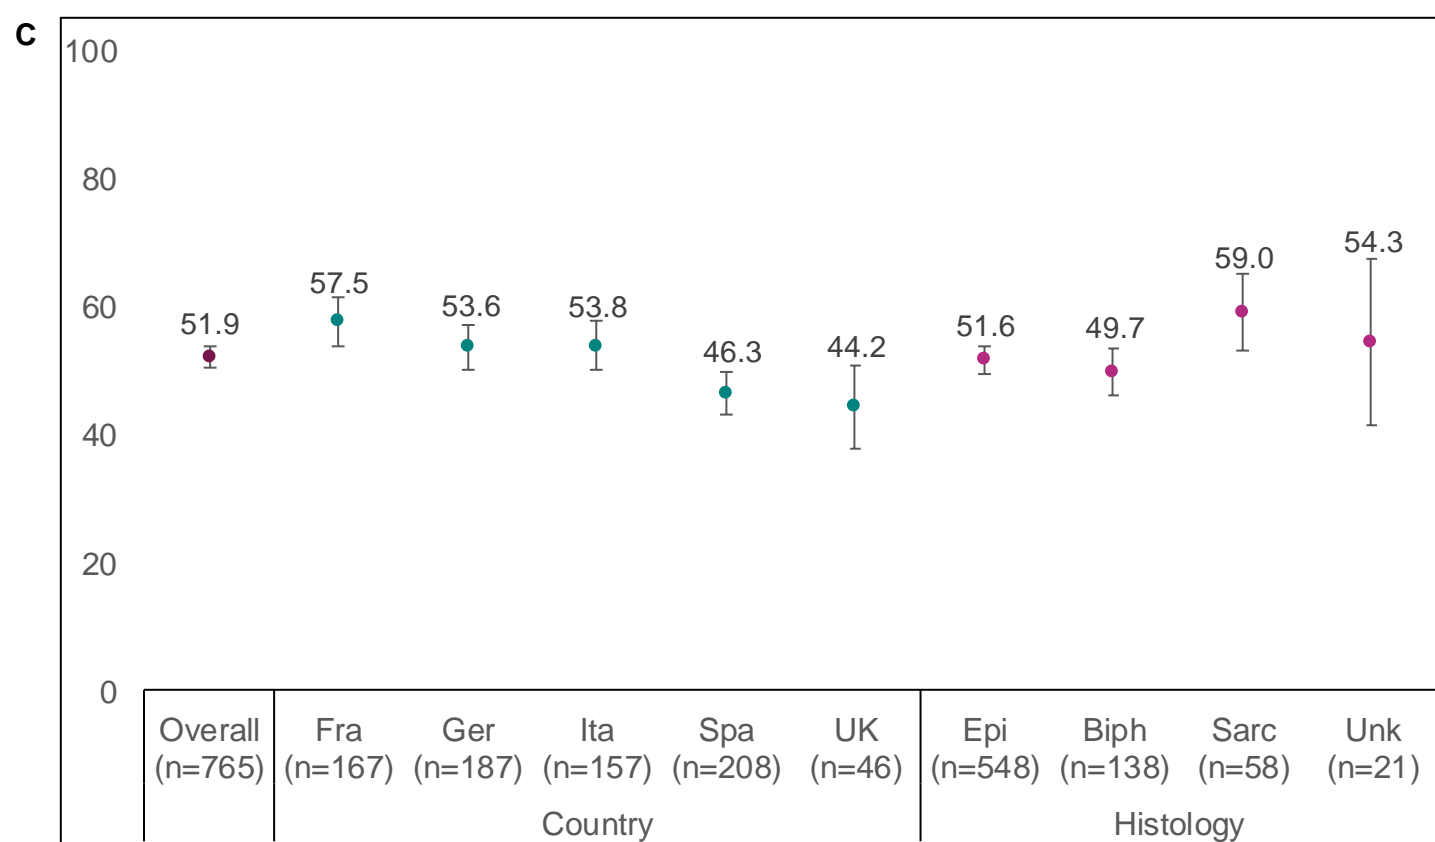

Supplement: 12885_2022_9750_MOESM6_ESM.pdf [file 12885_2022_9750_MOESM6_ESM.pdf]
